# Supplementary material for: Membrane Charge Primes the Necroptotic Kinase RIPK3 for Amyloid Assembly
Source: Research Square preprint supplement (doi:10.21203/rs.3.rs-6457808/v1), 2025-04-25
Supplement: Supplementary file 1 [file 71c776d67675c7ce09118478.docx]

**Supporting Information for:**

**Membrane Charge Primes the Necroptotic Kinase RIPK3 for Amyloid Assembly**

Fátima Escobedo-González1, Andrea Gelardo1, Alexandra

Reimers1, Paula Polonio1, Miguel Mompeán1*, Gustavo A. Titaux-Delgado1*

1Instituto de Química Física Blas Cabrera, Consejo Superior de Investigaciones Científicas (IQF-CSIC), Serrano 119, 28006 Madrid, Spain.

*Correspondence: [mmompean@iqf.csic.es](mailto:mmompean@iqf.csic.es), [gtitaux@iqf.csic.es](mailto:gtitaux@iqf.csic.es)

**Contents**

**-Materials and Methods**

Protein Expression and Purification

Preparation of DIBMALPs

Thioflavin T fluorescence assays of amyloid assembly

NMR spectroscopy

**-Supplementary Figures**

Figure S1. Negatively charged DIBMALPs remain stable at pH 4.0.

Figure S2. RIPK3 interacts strongly with negatively charged, but not so with neutral, DIBMALPs at pH 6.5

**Materials and Methods**

**Protein Expression and Purification**

The human RIPK3 (387–518) construct, codon-optimized for *Escherichia coli* expression, was purchased from GenScript (New Jersey, NJ, USA) and subcloned into a pET11a-derived vector containing an N-terminal His₆-tag followed by a tobacco etch virus (TEV) protease cleavage site. The resulting fusion protein was expressed in *E. coli* BL21 (DE3) cells.

Transformed *E. coli* cells were initially cultured in 2 L of 2×YT medium at 37°C until an optical density at 600 nm (OD₆₀₀) of 0.6–0.8 was reached. Cells were harvested by centrifugation at 4,000 × g for 15 minutes at 4°C, and the resulting pellet was resuspended in 0.5 L of M9 minimal medium supplemented with ¹³C-glucose and ¹⁵NH₄Cl (Cambridge Isotope Laboratories) as the sole carbon and nitrogen sources, respectively. To ensure efficient isotopic labeling, cells were incubated for 1.5 hours at 37°C prior to induction. Protein expression was induced by addition of 0.5 mM IPTG, followed by overnight incubation at 25°C.

For protein purification, harvested cells were resuspended in lysis buffer containing 20 mM Tris-HCl, 150 mM NaCl, and 1 mM EDTA (pH 8.0), and lysed by sonication on ice in 45-second bursts for 3 to 5 cycles. The lysate was clarified by centrifugation at 20,000 rpm for 20 minutes at 4°C, and the insoluble fraction containing inclusion bodies was collected. Inclusion bodies were solubilized in a buffer containing 6 M guanidine hydrochloride (GuHCl), 20 mM Tris-HCl (pH 8.0), and 2 mM DDT. The His-tagged protein was purified under denaturing conditions using a Ni²⁺-affinity chromatography column 5mL (HiTrap, Cytiva, Freiburg, Germany).

The Ni²⁺-affinity column was washed with a buffer containing 8 M urea, 50 mM Tris-HCl, and 1 mM DTT (pH 8.0). Bound protein was eluted using the same buffer supplemented with 500 mM imidazole, also adjusted to pH 8.0. The eluted protein solution was passed through a 0.22 μm membrane filter and subsequently subjected to size-exclusion chromatography (SEC) using a Superose 6 Increase 10/300 GL column (Cytiva, Freiburg, Germany) connected to an ÄKTA FPLC system (Cytiva, Freiburg, Germany), to separate monomeric protein from higher-order oligomeric species.

**Preparation of DIBMALPs**

1,2-dimyristoyl-sn-glycero-3-phosphocholine, DMPC and 1,2-dimyristoyl-sn-glycero-3-phospho-(1'-rac-glycerol), DMPG lipid (Avanti Polar Lipids) powders were individually resuspended in phosphate buffer (20 mM Na₂HPO₄/NaH₂PO₄, pH 6.5) to a final concentration of 20 mM. Each lipid suspension was thoroughly mixed by vortexing and equilibrated at 30°C for 15 minutes. To promote the formation of unilamellar structures, the suspensions underwent nine freeze–thaw cycles by alternating immersion in liquid nitrogen and a 60°C water bath. Large unilamellar vesicles (LUVs) were then prepared by extruding each lipid suspension 30 times through a 100 nm polycarbonate membrane using a manual extruder (Avanti Polar Lipids, Germany).

Lyophilized diisobutylene/maleic acid copolymer (DIBMA) was purchased from Cube Biotech (Monheim am Rhein, Germany) and reconstituted in phosphate buffer (20 mM Na₂HPO₄/NaH₂PO₄, pH 6.5) to a final concentration of 100 mg/mL. The polymer solution was then added gradually to the LUV suspension to obtain a final lipid-to-polymer mass ratio of 1:1. The resulting mixture was incubated at 30°C for at least 1 hour to initiate DIBMALPs assembly. To ensure complete formation and stabilization, samples were subsequently maintained at 4°C for 16 hours. Insoluble aggregates were removed by centrifugation at 15,000 × g for 30 minutes at 4°C.

To further purify the preparations and separate potential aggregates or polymer excess, samples were subjected to size-exclusion chromatography (SEC). A Superdex 200 Increase 10/300 GL column (Cytiva, Freiburg, Germany), connected to an ÄKTA purifier system (Cytiva, Freiburg, Germany), was equilibrated with two column volumes of 20 mM Na₂HPO₄/NaH₂PO₄ buffer at pH 6.5. DIBMALPs sample was loaded onto the column and eluted at a flow rate of 0.5 mL/min.

**Thioflavin T fluorescence assays of amyloid assembly**

To monitor amyloid formation under different experimental conditions, including pH variation and the presence of SDS, NaCl, or DIBMALPs, fluorescence assays with Thioflavin T (ThT) were performed. The assembly buffer contained 1 mM acetic acid, 1 mM TCEP, and 40 μM ThT, and its pH was adjusted to either 4.0 or 6.5 by stepwise addition of 100 mM Na₂CO₃. SEC-purified RIPK3 was maintained in its monomeric form in a denaturing buffer containing 8 M urea and 1 mM TCEP, pH 4.0, at a stock concentration of 200 µM. To initiate amyloid formation, aliquots of the monomeric RIPK3 stock were transferred into black half-area 96-well plates (Nunc, Denmark). Assembly was triggered by rapidly diluting the urea concentration to 100 mM through the addition of an assembly buffer pre-adjusted. This dilution also brought the final concentration of RIPK3 to 5 µM. All reactions were performed at room temperature.

Fluorescence was recorded immediately after mixing using a POLARstar Omega microplate reader (BMG Labtech) with excitation and emission filters set at 440 ± 10 nm and 480 ± 10 nm, respectively. Assays were performed in triplicate, and fluorescence data were collected every 30 seconds over a 20-hour period. The final protein concentration in each well was 5 μM, determined by absorbance at 280 nm using a NanoDrop™ 2000C spectrophotometer (Thermo Fisher Scientific, Scoresby, VIC, Australia).

**NMR spectroscopy**

Nuclear magnetic resonance (NMR) experiments were conducted at 298 K on a Bruker Avance Neo 800 MHz spectrometer (¹H frequency), equipped with a TCI cryoprobe and Z-gradient capabilities. All measurements were performed using uniformly ¹³C,¹⁵N-labeled RIPK3 protein samples.Prior to acquisition, samples were desalted into a buffer containing 90:10 H₂O/D₂O, supplemented with 1 mM acetic acid (pH adjusted to 4.0) and 1 mM TCEP. For pH titration experiments, the pH was incrementally raised to 5.0, 5.5, and 6.5 by the addition of small aliquots (0.5 µL) of 100 mM Na₂CO₃. Protein concentrations were estimated to be between 20 and 80 µM by measuring UV absorbance at 280 nm. Depending on the experimental condition, SDS, 1,6-hexanediol, or DIBMALPs were subsequently added to the samples to evaluate their effect on amyloid assembly under different environments.

Sequential backbone assignments were initiated using H(NCOCA)HN and (H)N(COCA)NH experiments, each acquired with 32 scans. Spectral widths and transmitter offsets were 12/20/4.70 ppm and 4.70/117/4.70 ppm (¹H/¹⁵N/¹H) for H(NCOCA)HN, and 12/20/20 ppm and 4.70/117/117 ppm (¹H/¹⁵N/¹⁵N) for (H)N(COCA)NH. Spin system connectivity was then established using standard ¹³C-based triple-resonance experiments: HNCA (¹H/¹⁵N/¹³C Spectral widths= 12/20/30 ppm; offsets = 4.70/117/53.2 ppm), CBCA(CO)NH (12/20/80 ppm; 4.70/117/43 ppm), HNCACB (9.7/20/80 ppm; 4.70/117/39.5 ppm), HNCO (12/20/12 ppm; 4.70/117/173.5 ppm), and HNCACO (9.7/23/16 ppm; 4.70/117/173.5 ppm). All experiments were acquired with 32 scans, except HNCO, which was acquired with 8 scans. Complete backbone assignments were achieved for all residues except prolines, which lack amide protons and are therefore not observable in these spectra.

All datasets were processed using TopSpin 4.1.8 (Bruker Biospin, Germany), and resonance assignments were performed with NMRFAM-Sparky. Proton chemical shifts were referenced directly to DSS, while ¹³C and ¹⁵N chemical shifts were referenced indirectly.

Rotating-frame (¹⁵N *R*1ρ) relaxation rates were determined using the standard Bruker pulse sequence hsqctref3gpsi with relaxation delays of 8, 36, 76, 100, 156 and 300 ms, and a spin-lock field strength of 2 kHz. Spectra were recorded with 16 scans using spectral widths of 12 ppm for ¹H and 20 ppm for ¹⁵N, and transmitter offsets of 4.70 and 117 ppm, respectively.

**Figure S1. Negatively charged DIBMALPs remain stable at pH 4.0.**

Transmission electron microscopy (TEM) images of DMPG-based DIBMALPs at pH 4.0 (**A**) before and (**B**) after addition of RIPK3(387–518).

**Figure S2. RIPK3 interacts strongly with negatively charged, but not so with neutral, DIBMALPs at pH 6.5.**

1H–15N HSQC spectra of RIPK3(387–518) in the presence of **(A)** negatively charged DMPG DIBMALPs (violet) or **(B)** neutral DMPC DIBMALPs (dark blue) at pH 6.5. Related to Figure 2 in the main text.
